# Supplementary material
Source: MDPI journal article supplement (https://www.mdpi.com/2073-445X/12/5/1009)
Supplement: s1 [file s1]

Table of LULC change dynamics in study area (2015-2022).

| LULC Classes      | Change (2015 to 2022) | Area (km) | Change (%age) |
|-------------------|-----------------------|-----------|---------------|
| Waterbody         | No Change             | 125       | 0.2           |
|                   | Agricultural Area     | 107       | 0.2           |
|                   | Built-up area         | 154       | 0.3           |
|                   | Desert Area           | 34        | 0.07          |
| Agricultural area | (no change)           | 6951      | 15.4          |
|                   | Waterbody             | 49        | 0.1           |
|                   | Built-up area         | 4122      | 9.1           |
|                   | Desert Area           | 1355      | 3             |
| Built-up area     | (no change)           | 2136      | 4.7           |
|                   | Waterbody             | 52        | 0.1           |
|                   | Agricultural Area     | 1730      | 3.8           |
|                   | Desert Area           | 423       | 0.9           |
| Desert area       | (no change)           | 25,167    | 56            |
|                   | Waterbody             | 14        | 0.03          |
|                   | Agricultural Area     | 732       | 1.6           |
|                   | Built-up area         | 1700      | 3.7           |
